# Supplementary material for: Comparison and Assessment of Different Land Cover Datasets on the Cropland in Northeast China
Source: MDPI journal article supplement (doi:10.3390/rs15215134), 2023-10-27
Supplement: s1 [file s1]

Table S1. The summary of the comparison of the claimed global accuracies in global land cover datasets vs the regionally achieved accuracies from different land cover datasets.

| Products         | Sample numbers | Global overall accuracy | Study                      | Region            | Sample numbers | Overall accuracy |
|------------------|----------------|-------------------------|----------------------------|-------------------|----------------|------------------|
| GLC2000          | 1265           | 68.5%                   | Yang et al. [1]            | China             | --             | 50.14%           |
| GLCNMO 2008      | 904            | 77.9%                   | Yang et al. [1]            | China             | --             | 48.76%           |
| CCI-LC 2010      | --             | 74.4%                   | Yang et al. [1]            | China             | --             | 58.65%           |
|                  |                |                         | Sun et al. [2]             | the loess Plateau | 900            | 74.2%            |
| GlobCover 2009   | --             | 67.5%                   | Lu et al. [3]              | China             | 5704           | 73.49%           |
| GlobeLand30 2010 | 159874         | 80.3%                   | Sun et al. [2]             | the loess Plateau | 900            | 86.7%            |
|                  |                |                         | Meng et al. [4]            | Shaanxi Province  | 1467           | 80.0%            |
|                  |                |                         | Lu et al. [3]              | China             | 5704           | 79.61%           |
|                  |                |                         | Wang et al. [5]            | China             | 8400           | 84.2%            |
|                  |                |                         | Kang et al. [6]            | Indonesia         | 2189           | 61.65%           |
|                  |                |                         | Jokar Arsanjani et al. [7] | Iran              | 821            | 77.9%            |
|                  |                |                         | Manakos et al. [8]         | Thessaly          | >500           | 77.9%            |
| GLC_FCS30 2015   | 44043          | 82.5%                   | Kang et al. [6]            | Indonesia         | 2232           | 65.59%           |
| GLASS 2010       | 12431          | 82.81%                  | Sun et al. [2]             | the loess Plateau | 900            | 39.4%            |

Table S2. The precision index values of the products in four phases derived from confusion matrix. (MCC is the Matthews correlation coefficient).

| Phase-2000     | User's accuracy | Producer's accuracy | Overall accuracy | MCC   |
|----------------|-----------------|---------------------|------------------|-------|
| GlobeLand30    | 0.832           | 0.889               | 0.901            | 0.784 |
| CLCD           | 0.817           | 0.879               | 0.891            | 0.763 |
| CCI-LC         | 0.771           | 0.874               | 0.868            | 0.719 |
| CLUDs          | 0.806           | 0.734               | 0.849            | 0.658 |
| GLC2000        | 0.777           | 0.658               | 0.819            | 0.586 |
| GLASS-GLC      | 0.706           | 0.741               | 0.806            | 0.574 |
| GLCNMO-2003    | 0.634           | 0.694               | 0.759            | 0.477 |
| GlobCover-2005 | 0.618           | 0.566               | 0.732            | 0.393 |
| Phase-2010     | User's accuracy | Producer's accuracy | Overall accuracy | MCC   |

|                |       |       |       |       |
|----------------|-------|-------|-------|-------|
| CLCD           | 0.836 | 0.891 | 0.903 | 0.788 |
| GlobeLand30    | 0.841 | 0.859 | 0.896 | 0.770 |
| CCI-LC         | 0.793 | 0.847 | 0.872 | 0.721 |
| CLUDs          | 0.794 | 0.705 | 0.836 | 0.628 |
| GLASS-GLC      | 0.765 | 0.711 | 0.826 | 0.608 |
| GLCNMO-2008    | 0.712 | 0.733 | 0.806 | 0.573 |
| GlobCover-2009 | 0.629 | 0.584 | 0.740 | 0.411 |
| GlobCover-2005 | 0.620 | 0.577 | 0.733 | 0.399 |

  

| Phase-2015        | User's accuracy | Producer's accuracy | Overall accuracy | MCC   |
|-------------------|-----------------|---------------------|------------------|-------|
| CLCD              | 0.863           | 0.859               | 0.899            | 0.781 |
| CCI-LC            | 0.809           | 0.828               | 0.866            | 0.712 |
| GLC_FCS30         | 0.745           | 0.906               | 0.852            | 0.704 |
| FROM-GLC-2017     | 0.826           | 0.735               | 0.847            | 0.664 |
| CLUDs             | 0.847           | 0.701               | 0.844            | 0.658 |
| FAO-GLCshare-2014 | 0.679           | 0.914               | 0.811            | 0.640 |
| CGLS-LC100        | 0.638           | 0.974               | 0.789            | 0.636 |
| GLASS-GLC         | 0.748           | 0.694               | 0.803            | 0.569 |
| GLCNMO-2013       | 0.627           | 0.899               | 0.767            | 0.569 |

  

| Phase-2020      | User's accuracy | Producer's accuracy | Overall accuracy | MCC   |
|-----------------|-----------------|---------------------|------------------|-------|
| CLCD-2019       | 0.898           | 0.871               | 0.915            | 0.817 |
| GlobeLand30     | 0.905           | 0.836               | 0.906            | 0.797 |
| GLC_FCS30       | 0.874           | 0.864               | 0.902            | 0.791 |
| Esri            | 0.885           | 0.831               | 0.896            | 0.777 |
| CLUDs           | 0.831           | 0.685               | 0.829            | 0.629 |
| CGLS-LC100-2019 | 0.566           | 0.984               | 0.710            | 0.539 |

Table S3. Numbers of the commission and omission error in each product in Phase-2015 and Phase-2020.

| Phase-2015<br>Numbers | GLCNMO<br>-2013 | CGLS-<br>LC100 | GLASS | FAO-GLC<br>share-2014 | CLUDs | FROM<br>-2017 | GLC_<br>FCS30 | CCI-LC | CLCD-<br>2019 |
|-----------------------|-----------------|----------------|-------|-----------------------|-------|---------------|---------------|--------|---------------|
| Commission<br>error   | 392             | 404            | 171   | 316                   | 93    | 113           | 227           | 143    | 100           |
| Omission<br>error     | 74              | 19             | 224   | 63                    | 219   | 194           | 69            | 126    | 103           |
| total                 | 466             | 423            | 395   | 379                   | 312   | 307           | 296           | 269    | 203           |

  

| Phase-2020<br>Numbers | CGLS-LC100<br>-2019 | CLUDs | Esri | GLC_FCS30 | GlobeLand30 | CLCD-2019 |
|-----------------------|---------------------|-------|------|-----------|-------------|-----------|
| Commission<br>error   | 568                 | 105   | 81   | 94        | 66          | 74        |
| Omission<br>error     | 12                  | 237   | 127  | 102       | 123         | 97        |
| total                 | 580                 | 342   | 208  | 196       | 189         | 171       |

Table S4. The area proportion of different agreement levels. P1 represents only one product identifies the pixel as cropland, P9 represents all nine products identify the pixel as cropland. The sum proportion of P1-P9 in each is 1.

| Phase | P1    | P2    | P3    | P4    | P5    | P6    | P7    | P8    | P9    |
|-------|-------|-------|-------|-------|-------|-------|-------|-------|-------|
| 2015  | 0.132 | 0.116 | 0.096 | 0.078 | 0.072 | 0.075 | 0.093 | 0.141 | 0.197 |
| 2020  | 0.295 | 0.111 | 0.086 | 0.086 | 0.137 | 0.285 |       |       |       |

Table S5. The Definition and classification of cropland for each data in this article.

| Dataset       | Classes                                                                                                                                                                                                          | Description                                                                                                                                                                                                                                                                                                                        |
|---------------|------------------------------------------------------------------------------------------------------------------------------------------------------------------------------------------------------------------|------------------------------------------------------------------------------------------------------------------------------------------------------------------------------------------------------------------------------------------------------------------------------------------------------------------------------------|
| GLASS-GLC     | 10. Cropland                                                                                                                                                                                                     | Rice paddy;<br>Greenhouse;<br>Other farmland;<br>Orchard;<br>Bare farmland.                                                                                                                                                                                                                                                        |
| GLC2000       | 21. Farmland                                                                                                                                                                                                     | Cropland (upland crops or inundated/flooded crops as e.g., rice).                                                                                                                                                                                                                                                                  |
| FAO-GLC share | 2 Cropland                                                                                                                                                                                                       | Herbaceous crops;<br>Woody crops;<br>Multiple or layered crops.<br>For a detailed explanation, see the website: <a href="#">Crop land - GLC-SHARE - Datasets - "FAO catalog"</a> .                                                                                                                                                 |
| CLUDs         | 1. cropland                                                                                                                                                                                                      | Land used for agriculture, orchard and beach, including irrigated and dry farmland, newly opened land, fruit, mulberry and forestry of agricultural, sea shoals of cultivated for more than three years, etc.                                                                                                                      |
| GLCNMO        | 11. Cropland<br>12. Paddy field<br>13. Cropland/<br>other vegetation                                                                                                                                             | Cropland: herbaceous crop(s);<br>Paddy field: graminoid crops//non-graminoid crops;<br>Cropland/other vegetation: cultivated and managed terrestrial area(s)/natural and semi-natural primarily terrestrial vegetation//cultivated aquatic or regularly flooded Area(s)/natural and semi-natural primarily terrestrial vegetation. |
| CCI-LC        | 10. Cropland, rainfed;<br>11. Herbaceous cover;<br>12. Tree or shrub cover;<br>20. Cropland, irrigated or post-flooding;<br>30. Mosaic cropland (>50%)/natural vegetation (tree, shrub, herbaceous cover) (<50%) |                                                                                                                                                                                                                                                                                                                                    |
| GlobCover     | 11. Post-flooding or irrigated croplands (or aquatic).<br>14. Rainfed croplands.<br>20. Mosaic cropland (50-70%)/vegetation (grassland/shrubland/forest) (20-50%).                                               | 11. Post-flooding or irrigated shrubs, tree crops, and herbaceous crops.<br>14. Rainfed herbaceous, shrub, or tree crops (cash crops, vineyards, olive trees, orchards).<br>20. Cultivated and managed terrestrial areas with primarily natural and semi-natural terrestrial vegetation.                                           |
| CGLS-LC100    | Crops                                                                                                                                                                                                            | Cultivated and managed vegetation/agriculture (cropland): lands covered with temporary crops followed by harvest and a bare soil period (e.g., single and multiple cropping systems).<br>Note that perennial woody crops will be classified as the appropriate forest or shrub land cover type.                                    |
| GlobeLand30   | 10. Cropland                                                                                                                                                                                                     | Land used for agriculture, horticulture and gardens, including paddy fields, irrigated and dry farmland, vegetable and fruit gardens, etc.                                                                                                                                                                                         |

|           |                                                                                                                           |                                                                                                                                       |
|-----------|---------------------------------------------------------------------------------------------------------------------------|---------------------------------------------------------------------------------------------------------------------------------------|
| CLCD      | 1. Cropland                                                                                                               | Cropland (paddy rice, greenhouse, others), orchard, managed grasslands, temporally bare croplands.                                    |
| GLC_FCS30 | 10. Rainfed/irrigated cropland;<br>11. Herbaceous cover;<br>12. Tree or shrub cover (orchard);<br>20. Irrigated cropland. |                                                                                                                                       |
| FROM-GLC  | 1. Cropland                                                                                                               | Cropland (paddy rice, greenhouse, others), orchard, managed grasslands, temporally bare croplands.                                    |
| Esri      | 5. Crops                                                                                                                  | Human planted/plotted cereals, grasses, and crops not at tree height;<br>Examples: corn, wheat, soy, fallow plots of structured land. |

Table S6. The following is the confusion matrix of each data in the four periods.

Phrase-2000

| GLASS-GLC     |              | product  |              | total |
|---------------|--------------|----------|--------------|-------|
|               |              | cropland | non-cropland |       |
| ground        | cropland     | 507      | 177          | 684   |
| “truth” value | non-cropland | 211      | 1105         | 1316  |
|               | total        | 718      | 1282         | 2000  |

| GLC2000       |              | product  |              | total |
|---------------|--------------|----------|--------------|-------|
|               |              | cropland | non-cropland |       |
| ground        | cropland     | 450      | 234          | 684   |
| “truth” value | non-cropland | 129      | 1187         | 1316  |
|               | total        | 679      | 1411         | 2000  |

| CLUDs         |              | product  |              | total |
|---------------|--------------|----------|--------------|-------|
|               |              | cropland | non-cropland |       |
| ground        | cropland     | 502      | 182          | 684   |
| “truth” value | non-cropland | 121      | 1195         | 1316  |
|               | total        | 623      | 1277         | 2000  |

| GLCNMO-2003   |              | product  |              | total |
|---------------|--------------|----------|--------------|-------|
|               |              | cropland | non-cropland |       |
| ground        | cropland     | 475      | 209          | 684   |
| “truth” value | non-cropland | 274      | 1042         | 1316  |
|               | total        | 749      | 1251         | 2000  |

| CCI-LC        |              | product  |              | total |
|---------------|--------------|----------|--------------|-------|
|               |              | cropland | non-cropland |       |
| ground        | cropland     | 598      | 86           | 684   |
| “truth” value | non-cropland | 178      | 1138         | 1316  |
|               | total        | 776      | 1224         | 2000  |

| GlobeLand30   |              | product  |              | total |
|---------------|--------------|----------|--------------|-------|
|               |              | cropland | non-cropland |       |
| ground        | cropland     | 608      | 76           | 684   |
| “truth” value | non-cropland | 123      | 1193         | 1316  |

|       |     |      |      |
|-------|-----|------|------|
| total | 731 | 1269 | 2000 |
|-------|-----|------|------|

| CLCD          |              | product  |              |       |
|---------------|--------------|----------|--------------|-------|
|               |              | cropland | non-cropland | total |
| ground        | cropland     | 601      | 83           | 684   |
| “truth” value | non-cropland | 135      | 1181         | 1316  |
|               | total        | 736      | 1264         | 2000  |

| GlobCover-2005 |              | product  |              |       |
|----------------|--------------|----------|--------------|-------|
|                |              | cropland | non-cropland | total |
| ground         | cropland     | 387      | 297          | 684   |
| “truth” value  | non-cropland | 239      | 1077         | 1316  |
|                | total        | 626      | 1374         | 2000  |

# Phrase-2010

| GLASS-GLC     |              | product  |              |       |
|---------------|--------------|----------|--------------|-------|
|               |              | cropland | non-cropland | total |
| ground        | cropland     | 489      | 199          | 688   |
| “truth” value | non-cropland | 150      | 1162         | 1312  |
|               | total        | 639      | 1361         | 2000  |

| CLUDs         |              | product  |              |       |
|---------------|--------------|----------|--------------|-------|
|               |              | cropland | non-cropland | total |
| ground        | cropland     | 485      | 203          | 688   |
| “truth” value | non-cropland | 126      | 1186         | 1312  |
|               | total        | 736      | 1264         | 2000  |

| GLCNMO-2008   |              | product  |              |       |
|---------------|--------------|----------|--------------|-------|
|               |              | cropland | non-cropland | total |
| ground        | cropland     | 504      | 184          | 688   |
| “truth” value | non-cropland | 204      | 1108         | 1312  |
|               | total        | 708      | 1292         | 2000  |

| GlobCover-2009 |              | product  |              |       |
|----------------|--------------|----------|--------------|-------|
|                |              | cropland | non-cropland | total |
| ground         | cropland     | 402      | 286          | 688   |
| “truth” value  | non-cropland | 237      | 1075         | 1312  |
|                | total        | 639      | 1361         | 2000  |

| CCI-LC        |              | product  |              |       |
|---------------|--------------|----------|--------------|-------|
|               |              | cropland | non-cropland | total |
| ground        | cropland     | 583      | 105          | 688   |
| “truth” value | non-cropland | 152      | 1160         | 1312  |
|               | total        | 737      | 1265         | 2000  |

| GlobeLand30   |              | product  |              |       |
|---------------|--------------|----------|--------------|-------|
|               |              | cropland | non-cropland | total |
| ground        | cropland     | 591      | 97           | 688   |
| “truth” value | non-cropland | 112      | 1200         | 1312  |

|               |              |          |              |       |
|---------------|--------------|----------|--------------|-------|
|               | total        | 703      | 1297         | 2000  |
| CLCD          |              | product  |              |       |
|               |              | cropland | non-cropland | total |
| ground        | cropland     | 613      | 75           | 688   |
| “truth” value | non-cropland | 120      | 1192         | 1312  |
|               | total        | 733      | 1267         | 2000  |

|                |              |          |              |       |
|----------------|--------------|----------|--------------|-------|
| GlobCover-2005 |              | product  |              |       |
|                |              | cropland | non-cropland | total |
| ground         | cropland     | 397      | 291          | 688   |
| “truth” value  | non-cropland | 243      | 1069         | 1312  |
|                | total        | 640      | 1360         | 2000  |

#### Phrase-2015

|               |              |          |              |       |
|---------------|--------------|----------|--------------|-------|
| GLASS-GLC     |              | product  |              |       |
|               |              | cropland | non-cropland | total |
| ground        | cropland     | 508      | 224          | 732   |
| “truth” value | non-cropland | 171      | 1097         | 1268  |
|               | total        | 679      | 1321         | 2000  |

|               |              |          |              |       |
|---------------|--------------|----------|--------------|-------|
| FAO-GLCshare  |              | product  |              |       |
|               |              | cropland | non-cropland | total |
| ground        | cropland     | 669      | 63           | 732   |
| “truth” value | non-cropland | 316      | 952          | 1268  |
|               | total        | 985      | 1015         | 2000  |

|               |              |          |              |       |
|---------------|--------------|----------|--------------|-------|
| CLUDs         |              | product  |              |       |
|               |              | cropland | non-cropland | total |
| ground        | cropland     | 513      | 219          | 732   |
| “truth” value | non-cropland | 93       | 1175         | 1268  |
|               | total        | 606      | 1394         | 2000  |

|               |              |          |              |       |
|---------------|--------------|----------|--------------|-------|
| GLCNMO        |              | product  |              |       |
|               |              | cropland | non-cropland | total |
| ground        | cropland     | 658      | 74           | 732   |
| “truth” value | non-cropland | 392      | 876          | 1268  |
|               | total        | 1050     | 950          | 2000  |

|               |              |          |              |       |
|---------------|--------------|----------|--------------|-------|
| CCI-LC        |              | product  |              |       |
|               |              | cropland | non-cropland | total |
| ground        | cropland     | 606      | 126          | 732   |
| “truth” value | non-cropland | 143      | 1125         | 1268  |
|               | total        | 749      | 1251         | 2000  |

|               |              |          |              |       |
|---------------|--------------|----------|--------------|-------|
| CGLS-LC100    |              | product  |              |       |
|               |              | cropland | non-cropland | total |
| ground        | cropland     | 713      | 19           | 732   |
| “truth” value | non-cropland | 404      | 864          | 1268  |
|               | total        | 1117     | 883          | 2000  |

| CLCD          |              | product  |              |       |
|---------------|--------------|----------|--------------|-------|
|               |              | cropland | non-cropland | total |
| ground        | cropland     | 629      | 103          | 732   |
| “truth” value | non-cropland | 100      | 1168         | 1268  |
|               | total        | 729      | 1271         | 2000  |

| GLC_FCS30     |              | product  |              |       |
|---------------|--------------|----------|--------------|-------|
|               |              | cropland | non-cropland | total |
| ground        | cropland     | 663      | 69           | 732   |
| “truth” value | non-cropland | 227      | 1041         | 1268  |
|               | total        | 890      | 1110         | 2000  |

| FROM-2017     |              | product  |              |       |
|---------------|--------------|----------|--------------|-------|
|               |              | cropland | non-cropland | total |
| ground        | cropland     | 538      | 194          | 732   |
| “truth” value | non-cropland | 113      | 1155         | 1268  |
|               | total        | 651      | 1349         | 2000  |

#### Phrase-2020

| GlobeLand30   |              | product  |              |       |
|---------------|--------------|----------|--------------|-------|
|               |              | cropland | non-cropland | total |
| ground        | cropland     | 629      | 123          | 752   |
| “truth” value | non-cropland | 66       | 1182         | 1248  |
|               | total        | 695      | 1305         | 2000  |

| CLUDs         |              | product  |              |       |
|---------------|--------------|----------|--------------|-------|
|               |              | cropland | non-cropland | total |
| ground        | cropland     | 515      | 237          | 752   |
| “truth” value | non-cropland | 105      | 1143         | 1248  |
|               | total        | 620      | 1380         | 2000  |

| CGLS-LC100    |              | product  |              |       |
|---------------|--------------|----------|--------------|-------|
|               |              | cropland | non-cropland | total |
| ground        | cropland     | 740      | 12           | 752   |
| “truth” value | non-cropland | 568      | 680          | 1248  |
|               | total        | 1308     | 1692         | 2000  |

| CLCD          |              | product  |              |       |
|---------------|--------------|----------|--------------|-------|
|               |              | cropland | non-cropland | total |
| ground        | cropland     | 655      | 97           | 752   |
| “truth” value | non-cropland | 74       | 1174         | 1248  |
|               | total        | 729      | 1271         | 2000  |

| Esri          |              | product  |              |       |
|---------------|--------------|----------|--------------|-------|
|               |              | cropland | non-cropland | total |
| ground        | cropland     | 625      | 127          | 752   |
| “truth” value | non-cropland | 81       | 1167         | 1248  |
|               | total        | 706      | 1294         | 2000  |

GLC\_FCS30 product

|                         |              | cropland | non-cropland | total |
|-------------------------|--------------|----------|--------------|-------|
| ground<br>“truth” value | cropland     | 650      | 102          | 752   |
|                         | non-cropland | 94       | 1154         | 1248  |
|                         | total        | 744      | 1256         | 2000  |

## References:

- [1] Yang Y, Xiao P, Feng X, et al. Accuracy assessment of seven global land cover datasets over China [J]. ISPRS Journal of Photogrammetry and Remote Sensing, 2017, 125: 156-173.
- [2] Sun W, Ding X, Su J, et al. Land use and cover changes on the Loess Plateau: A comparison of six global or national land use and cover datasets [J]. Land Use Policy, 2022, 119: 106165.
- [3] Lu M, Wenbin W, Zhang L, et al. A comparative analysis of five global cropland datasets in China [J]. Science China Earth Sciences, 2016.
- [4] We M. Accuracy Assessment for Regional Land Cover Remote Sensing Mapping Product Based on Spatial Sampling: A Case Study of Shaanxi Province, China [J]. Journal of Geo-information Science, 2015.
- [5] Wang Y, Zhang J, Liu D, et al. Accuracy Assessment of GlobeLand30 2010 Land Cover over China Based on Geographically and Categorically Stratified Validation Sample Data [J]. Remote Sensing, 2018, 10(8): 1213.
- [6] Kang J, Wang Z, Sui L, et al. Consistency Analysis of Remote Sensing Land Cover land Products in the Tropical Rainforest Climate Region: A Case Study of Indonesia [J]. Remote Sensing, 2020, 12(9): 1410.
- [7] Jokar Arsanjani J, Tayyebi A, Vaz E. GlobeLand30 as an alternative fine-scale global land cover map: Challenges, possibilities, and implications for developing countries [J]. Habitat International, 2016, 55: 25-31.
- [8] Manakos I, Karakizi C, Gkinis I, et al. Validation and Inter-Comparison of Spaceborne Derived Global and Continental Land Cover Products for the Mediterranean Region: The Case of Thessaly [J]. Land, 2017, 6(2): 34.
